# Supplementary material
Source: PubMed Central journal article supplement (PMC6497547)
Supplement: NIHMS1521525-supplement-1.pdf [file NIHMS1521525-supplement-1.pdf]

**Molecular characterization of prostate cancer with associated Gleason score using mass spectrometry imaging**

**Supplementary Data**

Elizabeth C. Randall <sup>1</sup>, Giorgia Zadra <sup>2,3</sup>, Paolo Chetta <sup>3,4</sup>, Begona G. C. Lopez <sup>5</sup>, Sudeepa Syamala <sup>3</sup>, Sankha S. Basu <sup>2</sup>, Jeffrey N. Agar <sup>6</sup>, Massimo Loda <sup>2,3</sup>, Clare M. Tempany <sup>1</sup>, Fiona M. Fennessy <sup>1,3</sup>, Nathalie Y. R. Agar <sup>1,3,5</sup>

<sup>1</sup>Department of Radiology, Brigham and Women's Hospital, Harvard Medical School, Boston, MA

<sup>2</sup>Department of Pathology, Brigham and Women's Hospital, Harvard Medical School, Boston, MA

<sup>3</sup>Dana-Farber Cancer Institute, Harvard Medical School, Boston, MA

<sup>4</sup>University of Milan, Milan, Italy

<sup>5</sup>Department of Neurosurgery, Brigham and Women's Hospital, Harvard Medical School, Boston, MA

<sup>6</sup>Chemistry and Chemical Biology, Northeastern University, Boston, MA

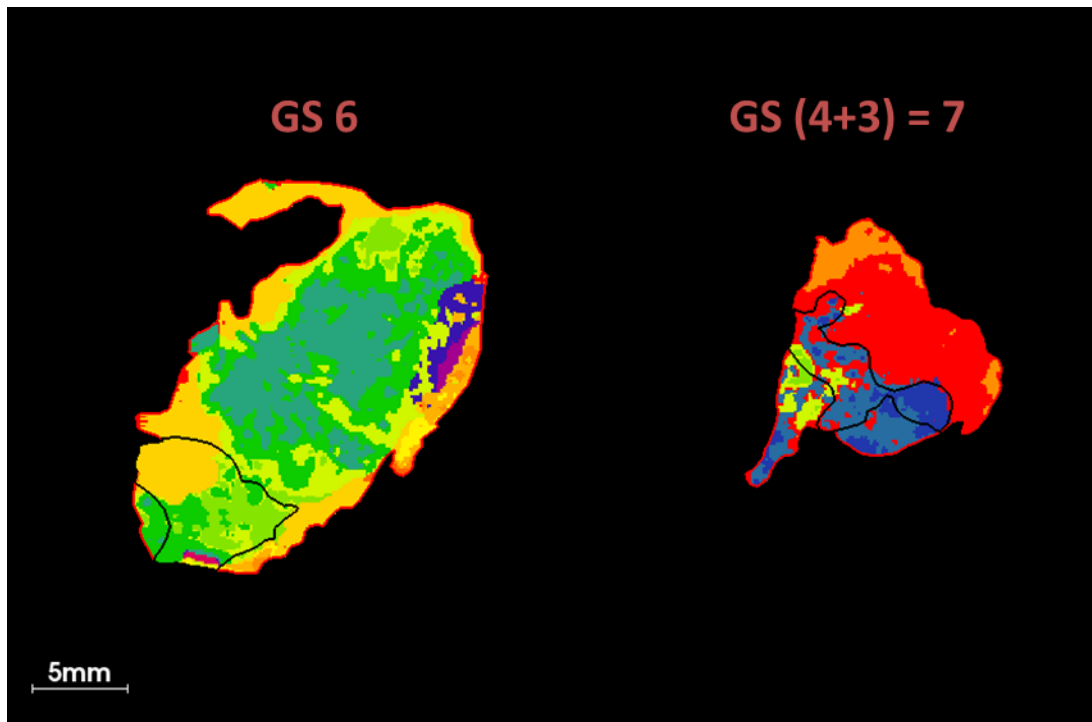

*Supplementary Fig. S1. Segmentation map of a subset of lower Gleason tissue specimens, demonstrates regional differences between tumor and normal tissue, and between the two different Gleason grades.*

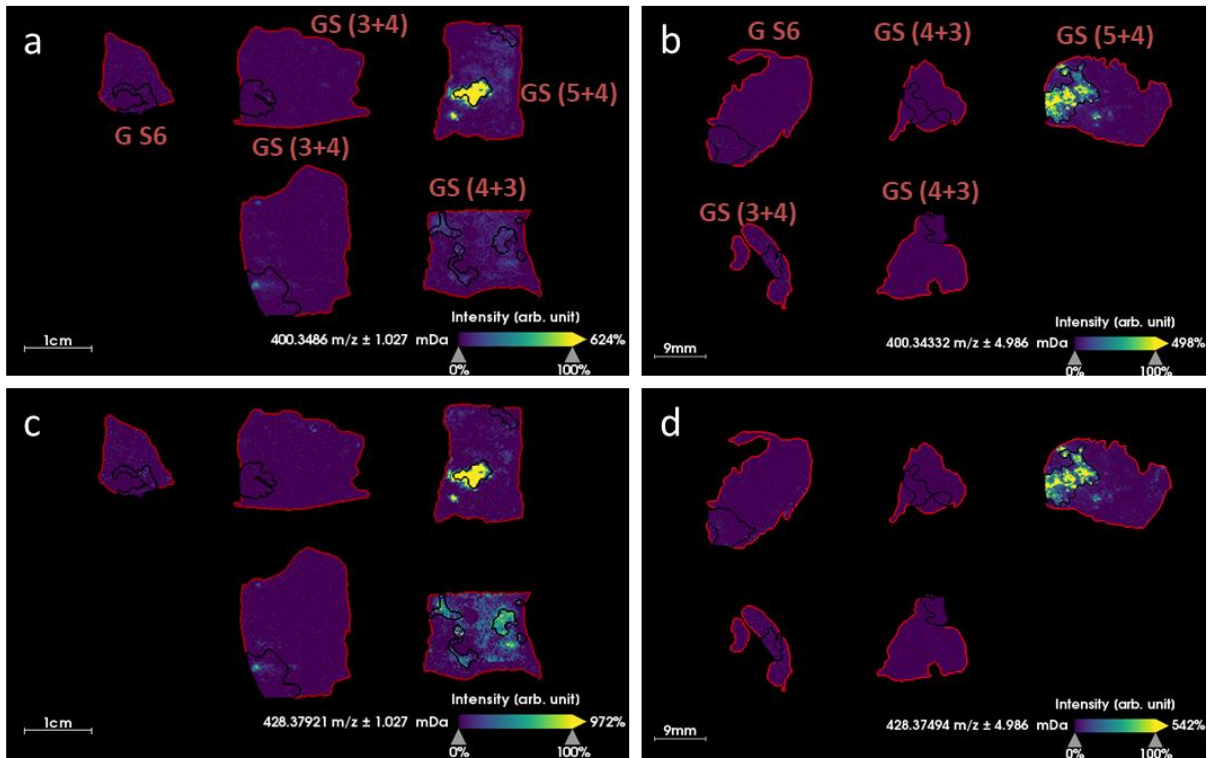

Supplementary Fig. S2. Example MALDI ion images of 2 long chain acylcarnitine species, (a-b) palmitoylcarnitine ( $m/z$  400.3433,  $\Delta\text{ppm} = 2.9$ ) and (c-d) stearoylcarnitine ( $m/z$  428.3749,  $\Delta\text{ppm} = 3.5$ ); these are detected with high intensity in GS 9 specimens, low intensity in one specimen of GS (4+3) = 7 and in one very small region of one specimen of GS (3+4), and not detected at all in GS 6.

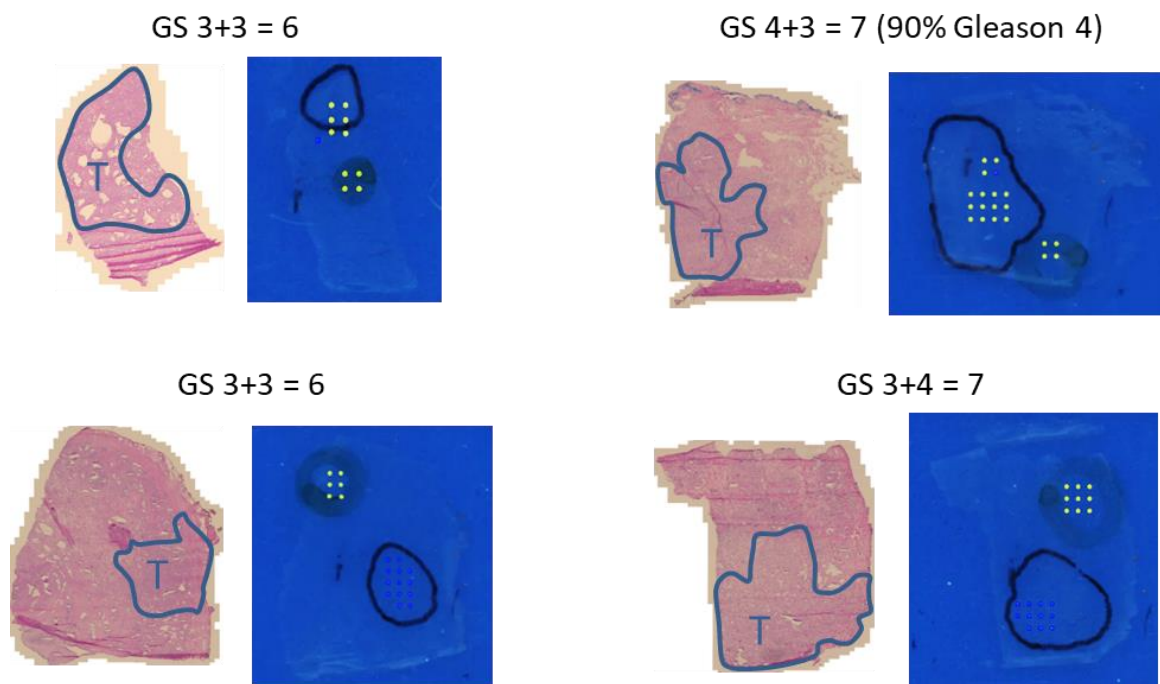

*Supplementary Fig. S3.* Annotated H&E and serial frozen sections of human prostate tissue, tumor regions are outlined in blue and marked 'T', and regions of normal epithelium were marked in green. Locations selected for LESA MS analysis are marked as yellow or blue spots over regions transferred from the H&E sections. The maximum number of points to fit within designated tumor or normal regions and spaced 1 mm apart, were selected and analyzed.

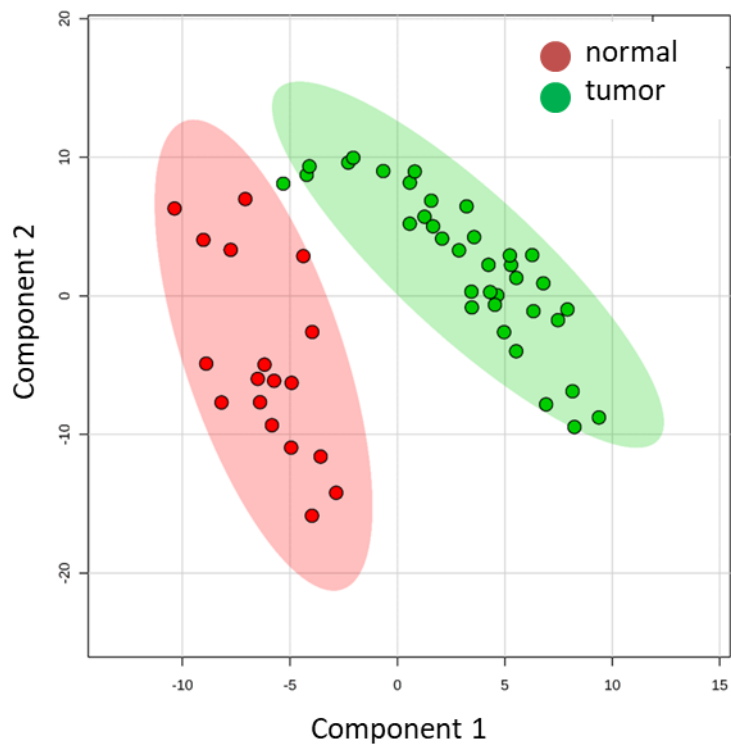

*Supplemental Fig. S4* Scores plot from PLSDA multivariate analysis of LESA MS data from tumor and normal prostate tissue.

*Supplementary Table 1.* Pathological description of specimens used for MALDI MSI, cases were staged according to AJCC TNM 8<sup>th</sup> edition.

| <b>Specimen</b> | <b>pT</b> | <b>pN</b> | <b>Extraprostatic extension</b> | <b>Seminal vesicles</b> | <b>Lymphovascular invasion</b> | <b>Resection margin</b> |
|-----------------|-----------|-----------|---------------------------------|-------------------------|--------------------------------|-------------------------|
| <b>1</b>        | 2         | 0         | not detected                    | tumor-free              | not detected                   | tumor-free              |
| <b>2</b>        | 3a        | 0         | present                         | tumor-free              | present                        | focally positive        |
| <b>3</b>        | 2         | 0         | not detected                    | tumor-free              | not detected                   | tumor-free              |
| <b>4</b>        | 3b        | 0         | present                         | both invaded            | not detected                   | tumor-free              |
| <b>5</b>        | 2         | X         | not detected                    | tumor-free              | present                        | focally positive        |
| <b>6</b>        | 3a        | X         | present                         | tumor-free              | present                        | tumor-free              |
| <b>7</b>        | 3a        | 0         | present                         | tumor-free              | not detected                   | focally positive        |
| <b>8</b>        | 3b        | 0         | present                         | both invaded            | present                        | positive                |
| <b>9</b>        | 3a        | X         | present                         | tumor-free              | not detected                   | focally positive        |
| <b>10</b>       | 2         | 0         | not detected                    | tumor-free              | not detected                   | tumor-free              |
